# Supplementary material
Source: PubMed Central journal article supplement (PMC4166921)
Supplement: supp_msu203_SupplementaryTables.pdf [file supp_msu203_SupplementaryTables.pdf]

Supplemental Table 1: Accession numbers of protein sequences

| <b>Species</b>          | <b>Pp1Y1</b> | <b>Pp1Y2</b> | <b>ARY</b> | <b>ORY</b>     | <b>WDY</b> | <b>PPrY</b> | <b>CCY</b> | <b>PRY</b> | <b>kl5</b> | <b>kl3</b> | <b>kl2</b> |
|-------------------------|--------------|--------------|------------|----------------|------------|-------------|------------|------------|------------|------------|------------|
| <i>D. melanogaster</i>  | AAL25117.1   | CAG70683.1   | DAA06294.1 | NP_001015498.3 | DAA06296.1 | AAL25119.1  | ACE79737.1 | DAA06439.1 | AAF21041.1 | AAG29546.2 | ACE79738.1 |
| <i>D. yakuba</i>        | DAA06405.1   | DAA06412.1   | DAA06433.1 | DAA06427.1     | DAA06446.1 | DAA06419.1  | ACE79736.1 | DAA06438.1 | ABY85408.1 | ACC62138.2 | ACC62141.2 |
| <i>D. erecta</i>        | DAA06404.1   | DAA06411.1   | DAA06428.1 | DAA06426.1     | ADZ32503.1 | DAA06418.1  | ACE79735.1 | ABY59799.1 | ABY85406.1 | ACC62135.4 | ACC62139.1 |
| <i>D. ananassae</i>     | DAA06403.1   | DAA06410.1   | DAA06413.1 | DAA06425.1     | ABY59794.1 | DAA06417.1  | ACE79734.1 | DAA06437.1 | ABY85403.1 | ACC62134.4 | ACC62142.1 |
| <i>D. willistoni</i>    | DAA06402.1   | DAA06409.1   | DAA06295.1 | DAA06424.1     | DAA06443.1 | DAA06416.1  | ACE79732.1 | DAA06435.1 | DAA06397.1 | ACC62133.4 | ACC62143.2 |
| <i>D. mojavensis</i>    | -            | DAA06408.1   | DAA06430.1 | DAA06423.1     | DAA06441.1 | DAA06415.1  | ACE79731.1 | ADF80168.1 | ABY85400.2 | ACC62137.2 | ACC62149.2 |
| <i>D. virilis</i>       | DAA06401.1   | DAA06407.1   | ADF80166.1 | DAA06422.1     | DAA06442.1 | DAA06414.1  | ACE79730.1 | ABY59796.1 | ABY85394.2 | ACC62136.4 | ACC62147.1 |
| <i>D. grimshawi</i>     | DAA06400.1   | DAA06406.1   | DAA06429.1 | DAA06421.1     | DAA06440.1 | -           | ACE79729.1 | DAA06420.1 | ABY85393.1 | ACC62132.3 | ACC62144.2 |
| <i>D. pseudoobscura</i> | DAA06398.1   | DAA06399.1   | DAA06432.1 | AAW23319.1     | DAA06444.1 | ADF80167.1  | ACE79733.1 | ADF80164.1 | DAA05701.1 | DAA05699.1 | ACC62140.2 |

Supplemental Table 2: Accession numbers of nucleotide sequences

| <b>Species</b>          | <b>Pp1Y1</b> | <b>Pp1Y2</b> | <b>ARY</b> | <b>ORY</b>     | <b>WDY</b> | <b>PPrY</b> | <b>CCY</b> | <b>PRY</b> | <b>kl5</b> | <b>kl3</b> | <b>kl2</b> |
|-------------------------|--------------|--------------|------------|----------------|------------|-------------|------------|------------|------------|------------|------------|
| <i>D. melanogaster</i>  | AF427493.1   | AJ781055.1   | BK006427   | NM_001015498.3 | BK006449   | AF427495.1  | EU685282.1 | BK006442.1 | AF210453.1 | AF313480.2 | EU685283.1 |
| <i>D. yakuba</i>        | BK006413.1   | BK006420.1   | BK006426.1 | BK006457.1     | BK006450.1 | BK006435.1  | EU685281.1 | BK006441.1 | EU417452.1 | EU514472.2 | EU595398.2 |
| <i>D. erecta</i>        | BK006412.1   | BK006419.1   | BK006421.1 | BK006456.1     | HQ852741.1 | BK006434.1  | EU685280.1 | EU362867.1 | EU417450.1 | EU514469.3 | EU595396.1 |
| <i>D. ananassae</i>     | BK006411.1   | BK006418.1   | BK006429.1 | BK006455.1     | EU362855.1 | BK006433.1  | EU685279.1 | BK006440.1 | EU417447.1 | EU514468.3 | EU595399.1 |
| <i>D. willistoni</i>    | BK006410.1   | BK006417.1   | BK006428.1 | BK006454.1     | BK006446.1 | BK006432.1  | EU685277.1 | BK006438.1 | BK006568.1 | EU514467.3 | EU595400.2 |
| <i>D. mojavensis</i>    | -            | BK006416.1   | BK006423.1 | BK006453.1     | BK006444.1 | BK006431.1  | EU685276.1 | GU937421.1 | EU417444.2 | EU514471.2 | EU595403.2 |
| <i>D. virilis</i>       | BK006409.1   | BK006415.1   | GU937419.1 | BK006452.1     | BK006445.1 | BK006430.1  | EU685275.1 | EU362864.1 | EU417438.2 | EU514470.3 | EU595402.1 |
| <i>D. grimshawi</i>     | BK006408.1   | BK006414.1   | BK006422.1 | BK006451.1     | BK006443.1 | -           | EU685274.1 | BK006436.1 | EU417437.1 | EU514466.3 | EU595401.2 |
| <i>D. pseudoobscura</i> | BK006569.1   | BK006570.1   | BK006425.1 | AY857328.1     | BK006447.1 | GU937420.1  | EU685278.1 | GU937417.1 | BK005628.1 | BK005626.1 | EU595397.2 |

Supplemental Table 3: Counts of reads mapping to each gene in *D. melanogaster*

| <b>Gene</b>        | <b>Linkage</b> | <b>Female Rep 1</b> | <b>Female Rep 2</b> | <b>Male Rep 1</b> | <b>Male Rep 2</b> |
|--------------------|----------------|---------------------|---------------------|-------------------|-------------------|
| <i>ARY</i>         | Y              | 0                   | 0                   | 62                | 195               |
| <i>CCY</i>         | Y              | 0                   | 0                   | 329               | 833               |
| <i>ORY</i>         | Y              | 0                   | 0                   | 25                | 42                |
| <i>PP1Y1</i>       | Y              | 0                   | 0                   | 16                | 22                |
| <i>PP1Y2</i>       | Y              | 0                   | 0                   | 92                | 267               |
| <i>PPrY</i>        | Y              | 0                   | 0                   | 30                | 75                |
| <i>PRY</i>         | Y              | 0                   | 0                   | 21                | 57                |
| <i>WDY</i>         | Y              | 0                   | 0                   | 148               | 397               |
| <i>k12</i>         | Y              | 0                   | 0                   | 136               | 287               |
| <i>k13</i>         | Y              | 0                   | 2                   | 122               | 254               |
| <i>k15</i>         | Y              | 0                   | 0                   | 289               | 568               |
| <b>Total reads</b> |                | 23855845            | 64625294            | 22628970          | 71918838          |

Supplemental Table 4: Counts of reads mapping to each gene in *D. ananassae*

| <b>Gene</b>        | <b>Linkage</b> | <b>Female Rep 1</b> | <b>Female Rep 2</b> | <b>Male Rep 1</b> | <b>Male Rep 2</b> |
|--------------------|----------------|---------------------|---------------------|-------------------|-------------------|
| <i>ARY</i>         | Y              | 11                  | 9                   | 86                | 526               |
| <i>CCY</i>         | Y              | 1                   | 3                   | 71                | 180               |
| <i>ORY</i>         | Y              | 3                   | 2                   | 63                | 192               |
| <i>PP1Y1</i>       | Y              | 0                   | 0                   | 18                | 82                |
| <i>PP1Y2</i>       | Y              | 6                   | 6                   | 100               | 298               |
| <i>PPrY</i>        | Y              | 1                   | 1                   | 48                | 84                |
| <i>PRY</i>         | Y              | 0                   | 1                   | 9                 | 26                |
| <i>WDY</i>         | Y              | 1                   | 0                   | 54                | 69                |
| <i>k12</i>         | Y              | 3                   | 5                   | 63                | 171               |
| <i>k13</i>         | Y              | 14                  | 4                   | 156               | 454               |
| <i>k15</i>         | Y              | 0                   | 0                   | 289               | 568               |
| <b>Total reads</b> |                | 21659217            | 67356046            | 15894559          | 61812221          |

Supplemental Table 5: Counts of reads mapping to each gene in *D. yakuba*

| <b>Gene</b>        | <b>Linkage</b> | <b>Female Rep 1</b> | <b>Female Rep 2</b> | <b>Male Rep 1</b> | <b>Male Rep 2</b> |
|--------------------|----------------|---------------------|---------------------|-------------------|-------------------|
| <i>ARY</i>         | Y              | 0                   | 1                   | 38                | 418               |
| <i>CCY</i>         | Y              | 0                   | 10                  | 373               | 1498              |
| <i>ORY</i>         | Y              | 0                   | 2                   | 117               | 484               |
| <i>PP1Y1</i>       | Y              | 0                   | 2                   | 37                | 114               |
| <i>PP1Y2</i>       | Y              | 1                   | 1                   | 48                | 223               |
| <i>PPrY</i>        | Y              | 0                   | 1                   | 61                | 316               |
| <i>PRY</i>         | Y              | 0                   | 0                   | 9                 | 25                |
| <i>WDY</i>         | Y              | 0                   | 2                   | 72                | 320               |
| <i>k12</i>         | Y              | 0                   | 0                   | 68                | 426               |
| <i>k13</i>         | Y              | 4                   | 8                   | 118               | 1017              |
| <i>k15</i>         | Y              | 0                   | 5                   | 203               | 1348              |
| <b>Total reads</b> |                | 22457529            | 64308049            | 14050414          | 76143175          |

Supplemental Table 6: Counts of reads mapping to each gene in *D. pseudoobscura*

| <b>Gene</b>         | <b>Linkage</b> | <b>Female Rep 1</b> | <b>Female Rep 2</b> | <b>Male Rep 1</b> | <b>Male Rep 2</b> |
|---------------------|----------------|---------------------|---------------------|-------------------|-------------------|
| <b><i>ARY</i></b>   | autosome       | 18                  | 12                  | 1494              | 2206              |
| <b><i>CCY</i></b>   | autosome       | 370                 | 257                 | 18458             | 52912             |
| <b><i>ORY</i></b>   | autosome       | 10                  | 9                   | 519               | 615               |
| <b><i>PP1Y1</i></b> | autosome       | 8                   | 13                  | 552               | 1537              |
| <b><i>PP1Y2</i></b> | autosome       | 12                  | 10                  | 693               | 1867              |
| <b><i>PPrY</i></b>  | autosome       | 6                   | 2                   | 467               | 562               |
| <b><i>PRY</i></b>   | autosome       | 2                   | 2                   | 148               | 271               |
| <b><i>WDY</i></b>   | autosome       | 21                  | 18                  | 863               | 2292              |
| <b><i>k12</i></b>   | autosome       | 12                  | 2                   | 736               | 893               |
| <b><i>k13</i></b>   | autosome       | 19                  | 7                   | 1049              | 1450              |
| <b><i>k15</i></b>   | autosome       | 43                  | 42                  | 1225              | 5902              |
| <b>Total reads</b>  |                | 24242339            | 74533950            | 26447322          | 72665615          |

Supplemental Table 7: Counts of reads mapping to each gene in *D. mojavensis*

| <b>Gene</b>        | <b>Linkage</b> | <b>Female Rep 1</b> | <b>Female Rep 2</b> | <b>Male Rep 1</b> | <b>Male Rep 2</b> |
|--------------------|----------------|---------------------|---------------------|-------------------|-------------------|
| <i>ARY</i>         | autosome       | 15                  | 59                  | 1484              | 1815              |
| <i>CCY</i>         | autosome       | 129                 | 133                 | 8129              | 11849             |
| <i>ORY</i>         | Y              | 6                   | 5                   | 299               | 514               |
| <i>PP1Y2</i>       | autosome       | 9                   | 34                  | 737               | 1578              |
| <i>PPrY</i>        | Y              | 1                   | 1                   | 58                | 173               |
| <i>PRY</i>         | autosome       | 4                   | 13                  | 57                | 103               |
| <i>WDY</i>         | autosome       | 2                   | 23                  | 576               | 651               |
| <i>kI2</i>         | Y              | 5                   | 9                   | 464               | 970               |
| <i>kI3</i>         | Y              | 16                  | 25                  | 1434              | 3183              |
| <i>kI5</i>         | Y              | 23                  | 16                  | 1388              | 2996              |
| <b>Total reads</b> |                | 19033796            | 54613414            | 22056234          | 62081181          |

Supplemental Table 8: Counts of reads mapping to each gene in *D. virilis*

| <b>Gene</b>        | <b>Linkage</b> | <b>Female Rep 1</b> | <b>Female Rep 2</b> | <b>Male Rep 1</b> | <b>Male Rep 2</b> |
|--------------------|----------------|---------------------|---------------------|-------------------|-------------------|
| <i>ARY</i>         | autosome       | 82                  | 222                 | 598               | 1182              |
| <i>CCY</i>         | autosome       | 143                 | 425                 | 10756             | 8914              |
| <i>ORY</i>         | Y              | 4                   | 12                  | 239               | 426               |
| <i>PP1Y1</i>       | autosome       | 4                   | 23                  | 190               | 450               |
| <i>PP1Y2</i>       | autosome       | 7                   | 59                  | 109               | 1210              |
| <i>PPrY</i>        | autosome       | 0                   | 7                   | 34                | 148               |
| <i>PRY</i>         | Y              | 0                   | 2                   | 11                | 24                |
| <i>WDY</i>         | autosome       | 4                   | 32                  | 173               | 620               |
| <i>k12</i>         | Y              | 6                   | 28                  | 149               | 831               |
| <i>k13</i>         | Y              | 9                   | 60                  | 518               | 1975              |
| <i>k15</i>         | Y              | 7                   | 87                  | 578               | 2646              |
| <b>Total reads</b> |                | 23277181            | 74658687            | 20089745          | 78385383          |
